# Supplementary material for: Cumulative social disadvantage and risk of attention deficit hyperactivity disorder: Results from a nationwide cohort study
Source: PubMed Central journal article supplement — SSM Popul Health. 2020 Jan 31;10:100548. doi: 10.1016/j.ssmph.2020.100548 (PMC7016018; doi:10.1016/j.ssmph.2020.100548), 2020-01-31
Supplement: mmc1.pdf [file mmc1.pdf]

# Cumulative social disadvantage and risk of Attention Deficit Hyperactivity

## Disorder – Results from a nationwide cohort study.

### Supplementary material

**Table A1.** Effects of combinations of parental social disadvantages on child risk of ADHD.

Estimates from linear probability models including interaction terms between social disadvantages.

---

|                                                            |                                      |
|------------------------------------------------------------|--------------------------------------|
| Social disadvantages (ref. none)                           |                                      |
| Unemployment                                               | 0.012***<br>(0.001)<br>[0.011;0.013] |
| Relative income poverty                                    | 0.009***<br>(0.001)<br>[0.007;0.011] |
| Compulsory school or less                                  | 0.020***<br>(0.002)<br>[0.017;0.024] |
| Unemployment + relative income poverty                     | -0.002<br>(0.001)<br>[-0.013;0.006]  |
| Unemployment + compulsory school                           | 0.000<br>(0.003)<br>[-0.006;0.005]   |
| Relative income poverty + compulsory school                | 0.013***<br>(0.004)<br>[0.006;0.020] |
| Relative income poverty + compulsory school + unemployment | -0.003<br>(0.005)<br>[-0.013;0.006]  |
| R-squared                                                  | 4.8                                  |
| <i>N</i>                                                   | 632,609                              |

---

\*  $p < 0.05$ , \*\*  $p < 0.01$ , \*\*\*  $p < 0.001$ .

*Notes:* Robust standard errors in parentheses and 95% confidence interval in brackets. The following control variables are included: Gender, immigrant status, birth characteristics (weight, gestational age and 5-min. APGAR score), single parenthood, parent ADHD diagnosis, number of children in the household, and fixed effect dummies for birth year and residential region.
